# Supplementary material for: Effect of Methyl Jasmonate on the Terpene Trilactones, Flavonoids, and Phenolic Acids in Ginkgo biloba L. Leaves: Relevance to Leaf Senescence
Source: MDPI journal article supplement (doi:10.3390/molecules26154682), 2021-08-02
Supplement: s1 [file s1]

**Supplementary Table 1.** Data on the analysis of terpene trilactones (TTLs), phenolic acids and flavonoids in *Ginkgo biloba* leaves using HPLC-MS/MS

| Analyzed chemical       | Retention time (min) | MS/MS (m/z) |
|-------------------------|----------------------|-------------|
| Ginkgolide A            | 1.83                 | 407/351     |
| Ginkgolide B            | 1.83                 | 423/367     |
| Ginkgolide C            | 1.60                 | 439/353     |
| Ginkgolide J            | 1.67                 | 425/163     |
| Bilobalide              | 1.67                 | 325/163     |
| Rutin                   | 1.44                 | 609/301     |
| Quercetin 4-glucoside   | 1.51                 | 463/301     |
| (+) Catechin            | 1.38                 | 289/245     |
| (-) Epicatechin         | 1.30                 | 289/245     |
| Quercetin               | 1.83                 | 301/151     |
| Apigenin                | 1.92                 | 269/151     |
| Luteolin                | 1.60                 | 285/133     |
| Ferulic acid            | 1.35                 | 193/134     |
| <i>p</i> -Coumaric acid | 1.53                 | 163/119     |
| Caffeic acid            | 1.57                 | 179/135     |
